# Supplementary material
Source: publisher site journal article supplement (https://www.spandidos-publications.com/8293/downloadSupplementary)

Figure S1. Genotyping strategy and results of agarose gel electrophoresis. (A) Genotyping strategy. (B) Agarose gel electrophoresis. WT, wild-type; KO, knockout; M, marker; F, forward; R, reverse.

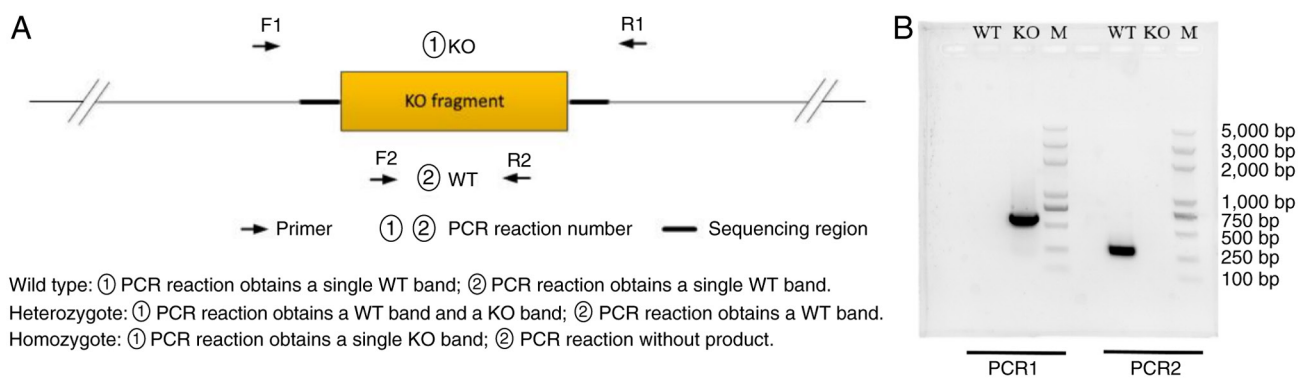

Supplement: Supplementary file 1 [file downloadSupplementary]
